# Supplementary material for: Facile Fabrication of α-Alumina Hollow Fiber-Supported ZIF-8 Membrane Module and Impurity Effects on Propylene Separation Performance
Source: MDPI journal article supplement (doi:10.3390/membranes12101015), 2022-10-19
Supplement: s1 [file s1]

# Facile Fabrication of $\alpha$ -Alumina Hollow Fiber-Supported ZIF-8 Membrane Module and Impurity Effects on Propylene Separation Performance

Taewhan Kim, Yeong Jae Kim, Chanjong Yu, Jongbum Kim and Kiwon Eum \*

School of Chemical Engineering, Soongsil University, Seoul 06978, Korea; xoghks@soongsil.ac.kr (T.K.); a950625@soongsil.ac.kr (Y.J.K.); ych96@soongsil.ac.kr (C.Y.); bumparty95@soongsil.ac.kr (J.K.)

\* Correspondence: kiwon.eum@ssu.ac.kr

**Table S1.** Summary of dry-jet-wet spinning condition for  $\alpha$ -alumina hollow fiber fabrication.

|                                                                              |                   |
|------------------------------------------------------------------------------|-------------------|
| <b>Dope Composition<br/>(PES/NMP/Al<sub>2</sub>O<sub>3</sub>/PVP) (wt %)</b> | 6.8/38.0/54.7/0.5 |
| <b>Dope Flow Rate (mL/h)</b>                                                 | 120               |
| <b>Bore Fluid</b>                                                            | DI-water          |
| <b>Bore Fluid Flow Rate (mL/h)</b>                                           | 80                |
| <b>Air Gap (cm)</b>                                                          | 3                 |
| <b>Take up Rate (m/min)</b>                                                  | / <sup>*</sup>    |
| <b>Operating Temperature (K)</b>                                             | 298               |
| <b>Quench Bath Temperature (K)</b>                                           | 298               |

<sup>\*</sup> Instead of using the take-up drum, the raw alumina fibers were collected from the bottom of the quenching bath.

## Gas permeation test

The permeance of gas through the membrane,  $F_i$ , is defined as:

$$F_i = \frac{R_i}{\Delta P_i \times A} \quad (S1)$$

Where,  $R_i$  is the mole rate of component  $i$  (mol/s),  $\Delta P_i$  is the partial pressure difference component  $i$  (Pa), across the membrane, and  $A$  is Area of the hollow fiber outer surface inside the membrane module (m<sup>2</sup>).

When the feed is two or three gas mixture and the sweep gas flows inside the fiber, the concentration of components  $i$  (ppm) passing through the membrane can be expressed as:

$$C_i = \frac{R_i}{R_0 + R_A + R_B} \quad (\text{The feed is a mixture of two gases}) \quad (S2)$$

$$C_i = \frac{R_i}{R_0 + R_A + R_B + R_C} \quad (\text{The feed is a mixture of three gases}) \quad (S3)$$

$R_0$  is the mole rate of sweep gas ( $mol/s$ ), which can be obtained from the ideal gas equation ( $\Delta P_0 V_0 = R_0 RT$ ), where  $\Delta P_0$ ,  $V_0$ ,  $R$ ,  $T$  means the partial pressure, volumetric flow rate, gas constant, and temperature of the sweep gas, respectively.

Since the  $C_i$  value can be found by plotting the Gas Chromatography results, the  $R_i$  value can be obtained using the above equation.

$$R_i = \frac{R_0 \times C_i}{1 - C_A - C_B} \quad (\text{The feed is a mixture of two gases}) \quad (S4)$$

$$R_i = \frac{R_0 \times C_i}{1 - C_A - C_B - C_C} \quad (\text{The feed is a mixture of three gases}) \quad (S5)$$

The mole flow rate before passing through the membrane can be calculated by the following equation

$$R_{0,i} = \frac{P_F \times V_i}{R \times T} \quad (S6)$$

Where,  $P_F$  is the feed pressure ( $pa$ ),  $V_i$  is the initial volumetric flow rate of the component  $i$  ( $m^3/s$ ).

By Dalton's law of partial pressure, partial pressure difference component  $i$  ( $\Delta P_i$ ) can be calculated as follows

$$\Delta P_i = P_F \times \frac{R_{0,i}}{R_{0,A} + R_{0,B}} - P_S \times C_i \quad (\text{binary gas mixture}) \quad (S7)$$

$$\Delta P_i = P_F \times \frac{R_{0,i}}{R_{0,A} + R_{0,B} + R_{0,C}} - P_S \times C_i \quad (\text{tertiary gas mixture}) \quad (S8)$$

Where,  $P_S$  is the pressure of the sweep gas ( $pa$ ).

The permeability of gas through the membrane,  $P_i$ , is defined as:

$$P_i = F_i \times l \quad (S9)$$

Where,  $l$  is the thickness of membrane ( $m$ ).

The selectivity ( $\alpha_{i,j}$ ) for component  $i$  over component  $j$  is defined as:

$$\alpha_{i,j} = \frac{P_i}{P_j} \quad (S10)$$

Where,  $P_i$  and  $P_j$  are the permeability of component  $i$  and  $j$  ( $\frac{mol \cdot m}{m^2 \cdot pa \cdot s}$ ).

The separation factor ( $\alpha_{i,j}$ ) for component  $i$  over component  $j$  is defined as:

$$\alpha_{i,j} = \frac{y_i/y_j}{x_i/x_j} \quad (S11)$$

Where,  $x_i$  and  $x_j$  are the molar fraction of component  $i$  and  $j$  in feed stream, respectively, and  $y_i$ ,  $y_j$  are the molar fraction of components  $i$  and  $j$  in the permeate stream, respectively.

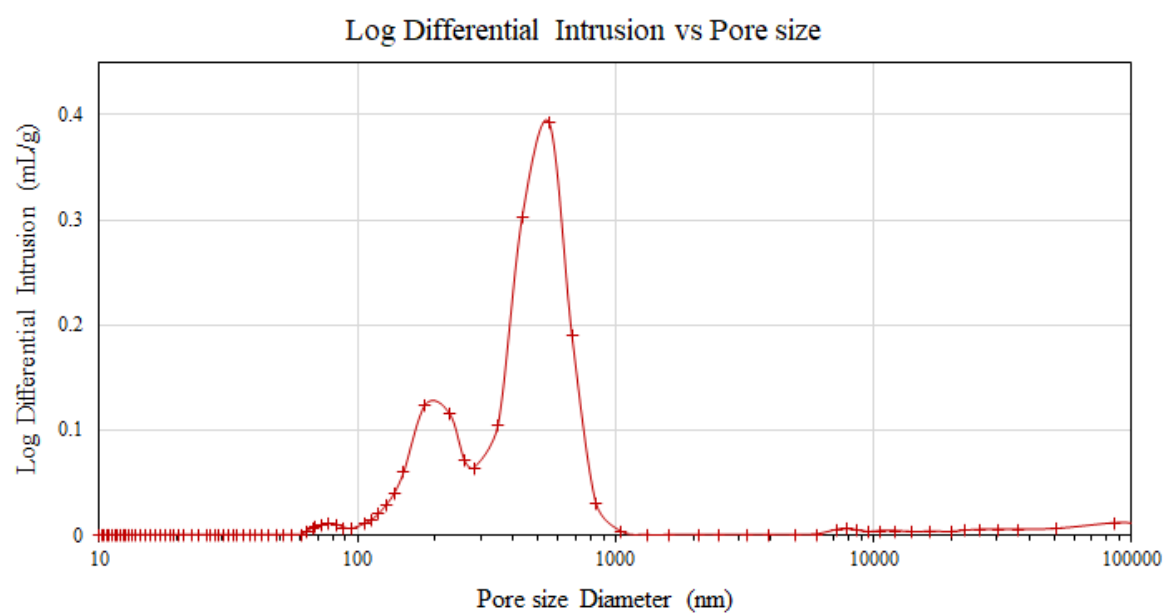

**Figure S1.** Pore size distribution of alumina hollow fiber by mercury porosimetry.
